# Supplementary material for: Exploring the genotype-environment interaction of bread wheat in ambient and high-temperature planting conditions: a rigorous investigation
Source: PubMed Central journal article supplement (PMC10825171; doi:10.1038/s41598-024-53052-w), 2024-01-29
Supplement: 41598_2024_53052_MOESM1_ESM.pdf [file 41598_2024_53052_MOESM1_ESM.pdf]

# Exploring the genotype-environment interaction of bread wheat in ambient and high-temperature planting conditions: a rigorous investigation

Vikrant Khare<sup>1,\*</sup>, Rama Shankar Shukla<sup>1</sup>, Suneeta Pandey<sup>2</sup>, Sanjay Kumar Singh<sup>1</sup> and Charan Singh<sup>3</sup>

<sup>1</sup>Department of Plant Breeding and Genetics, Jawaharlal Nehru Krishi Vishwavidyalaya, Jabalpur, Madhya Pradesh, 482004, India, Email id: [vikrantkhare@jnkvv.org](mailto:vikrantkhare@jnkvv.org), ORCID: 0000000179704817\*

<sup>2</sup>Department of Plant Breeding and Genetics, Agriculture University Jodhpur, Rajasthan, 342304, India

<sup>3</sup>Indian Institute of Wheat and Barley Research, 132001, Haryana, India

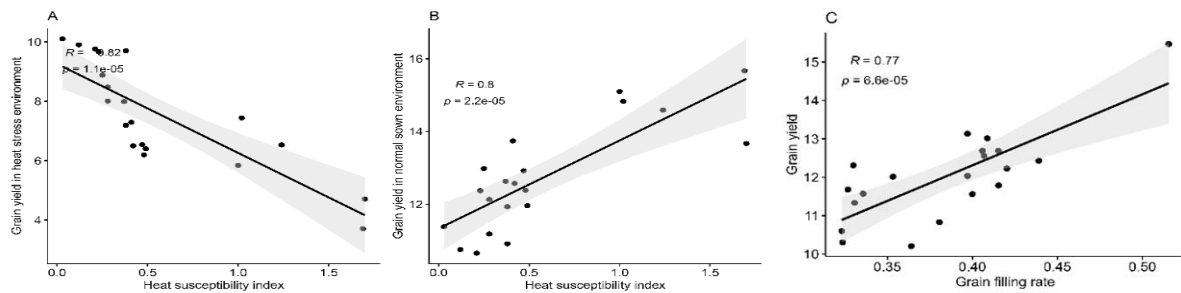

**Supplemental Figure 1.** Pattern of correlation coefficient A: correlation between heat susceptibility index and gain yield in heat stress environment, B: correlation between heat susceptibility index and gain yield in normal sown environment, C: correlation between grain filling rate and grain yield.

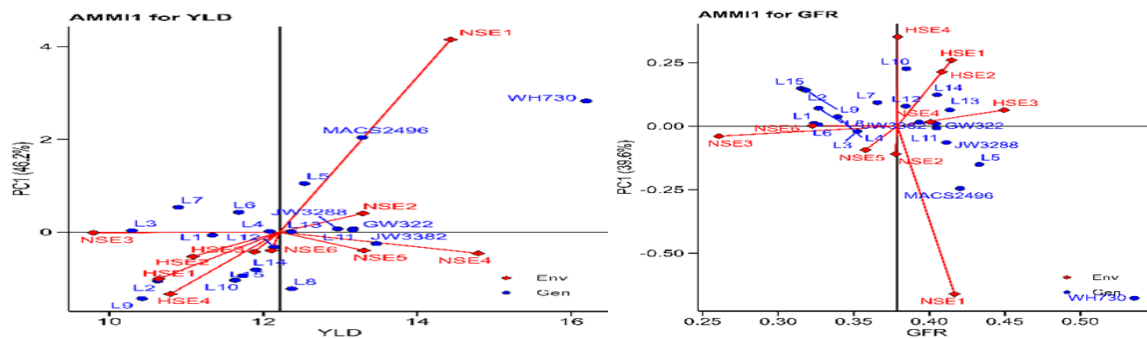

**Supplemental Figure 2.** Across all the environments “AMMI1” graphs displays the main effect and IPC1 effect values describing relationship among examined wheat genotype and environment.

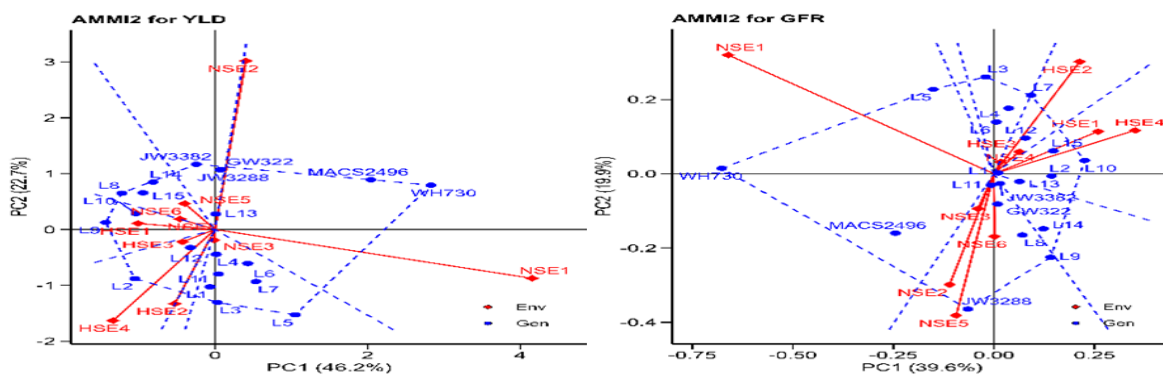

**Supplemental Figure 3.** Across all the environments “AMMI2” graphs displays both the axes of interaction (IPCA1 and IPCA2) values for genotype effect and genotype by environment interaction effect.

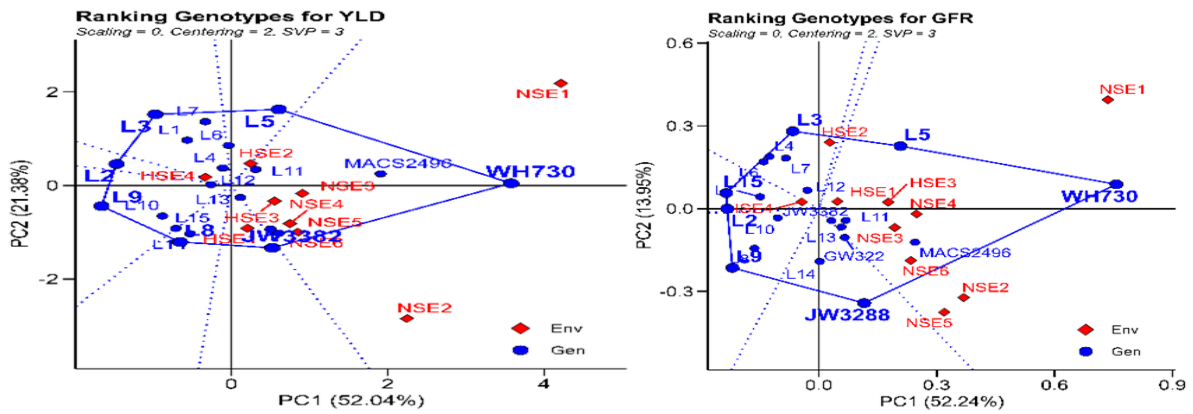

**Supplemental Figure 4.** Across all the environments polygon view of “Which-won-where” model of GGE biplot representing the performance of wheat genotypes and their interactions with environment.

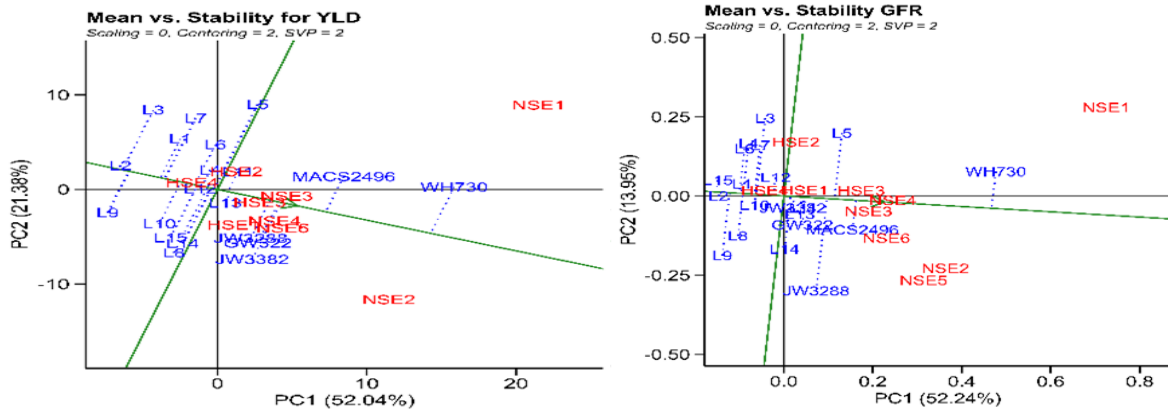

**Supplemental Figure 5.** Across all the environments “mean versus stability” model describing the interaction effect of wheat genotypes.

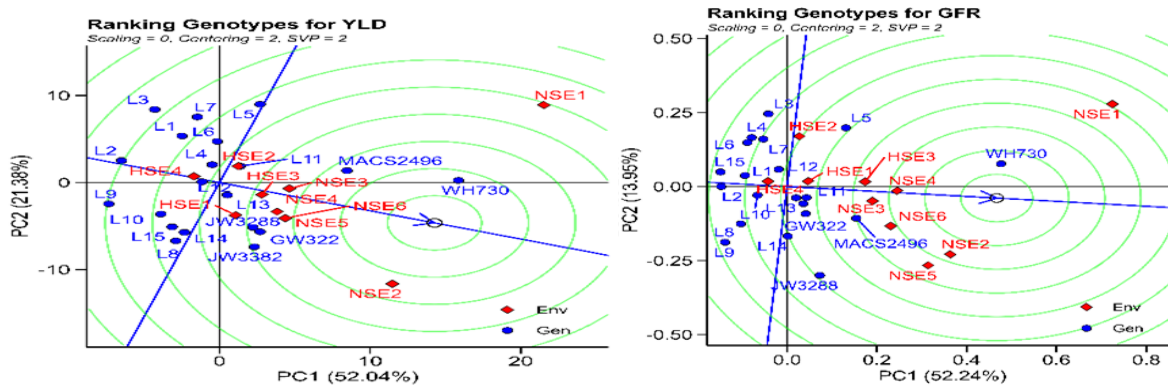

**Supplemental Figure 6.** Across all the environments “ranking genotypes” model of biplot assess other wheat genotypes against the ideal genotype conferring genotype interaction and genotype x environment interactions

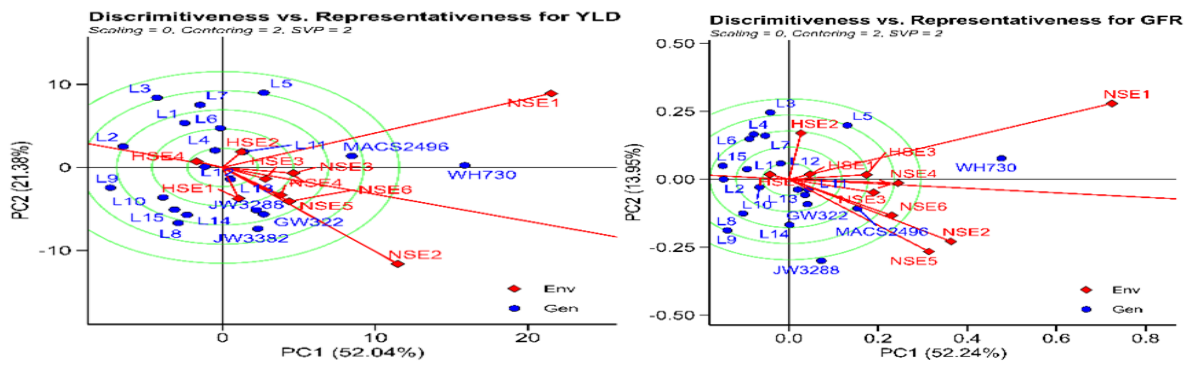

**Supplemental Figure 7.** Across all the environments “Discrimitiveness vs. Representativeness” model of biplot evaluate the wheat genotypes against the ideal genotypes, conferring genotype interaction and genotype x environment interactions.

**Supplemental Table 1.** Mean grain yield and grain filling rate for 20 genotypes evaluated in 6 normal sown environments.

| ENV                                 | GEN      | YLD   | GFR  | ENV  | GEN      | YLD   | GFR  | ENV  | GEN      | YLD   | GFR  |
|-------------------------------------|----------|-------|------|------|----------|-------|------|------|----------|-------|------|
| NSE1                                | L1       | 14.20 | 0.36 | NSE2 | L1       | 8.80  | 0.30 | NSE3 | L1       | 9.40  | 0.30 |
| NSE1                                | L2       | 9.10  | 0.26 | NSE2 | L2       | 8.05  | 0.23 | NSE3 | L2       | 10.50 | 0.28 |
| NSE1                                | L3       | 13.50 | 0.48 | NSE2 | L3       | 6.55  | 0.15 | NSE3 | L3       | 12.00 | 0.27 |
| NSE1                                | L4       | 14.20 | 0.41 | NSE2 | L4       | 13.65 | 0.27 | NSE3 | L4       | 11.00 | 0.21 |
| NSE1                                | L5       | 20.50 | 0.65 | NSE2 | L5       | 10.55 | 0.36 | NSE3 | L5       | 7.90  | 0.25 |
| NSE1                                | L6       | 15.90 | 0.39 | NSE2 | L6       | 11.85 | 0.34 | NSE3 | L6       | 10.80 | 0.29 |
| NSE1                                | L7       | 16.40 | 0.40 | NSE2 | L7       | 8.55  | 0.28 | NSE3 | L7       | 7.60  | 0.21 |
| NSE1                                | L8       | 8.80  | 0.26 | NSE2 | L8       | 14.80 | 0.37 | NSE3 | L8       | 10.10 | 0.24 |
| NSE1                                | L9       | 6.50  | 0.19 | NSE2 | L9       | 9.10  | 0.29 | NSE3 | L9       | 7.50  | 0.21 |
| NSE1                                | L10      | 9.40  | 0.29 | NSE2 | L10      | 12.90 | 0.37 | NSE3 | L10      | 9.10  | 0.22 |
| NSE1                                | L11      | 16.90 | 0.47 | NSE2 | L11      | 11.30 | 0.37 | NSE3 | L11      | 8.90  | 0.28 |
| NSE1                                | L12      | 13.70 | 0.43 | NSE2 | L12      | 13.10 | 0.41 | NSE3 | L12      | 7.30  | 0.22 |
| NSE1                                | L13      | 14.40 | 0.40 | NSE2 | L13      | 15.30 | 0.48 | NSE3 | L13      | 7.60  | 0.18 |
| NSE1                                | L14      | 10.10 | 0.31 | NSE2 | L14      | 15.80 | 0.49 | NSE3 | L14      | 8.00  | 0.23 |
| NSE1                                | L15      | 9.50  | 0.29 | NSE2 | L15      | 15.60 | 0.32 | NSE3 | L15      | 9.10  | 0.17 |
| Parents                             |          |       |      |      |          |       |      |      |          |       |      |
| NSE1                                | WH730    | 29.40 | 1.03 | NSE2 | WH730    | 20.10 | 0.61 | NSE3 | WH730    | 15.00 | 0.42 |
| NSE1                                | MACS2496 | 23.20 | 0.55 | NSE2 | MACS2496 | 17.30 | 0.55 | NSE3 | MACS2496 | 10.00 | 0.33 |
| Commercial checks                   |          |       |      |      |          |       |      |      |          |       |      |
| NSE1                                | GW322    | 15.00 | 0.43 | NSE2 | GW322    | 18.20 | 0.47 | NSE3 | GW322    | 10.40 | 0.25 |
| NSE1                                | JW3382   | 13.50 | 0.40 | NSE2 | JW3382   | 18.40 | 0.46 | NSE3 | JW3382   | 12.40 | 0.31 |
| NSE1                                | JW3288   | 14.50 | 0.38 | NSE2 | JW3288   | 16.00 | 0.45 | NSE3 | JW3288   | 11.30 | 0.40 |
| Supplemental Table 1. Continued ... |          |       |      |      |          |       |      |      |          |       |      |
| ENV                                 | GEN      | YLD   | GFR  | ENV  | GEN      | YLD   | GFR  | ENV  | GEN      | YLD   | GFR  |
| NSE4                                | L1       | 11.75 | 0.26 | NSE5 | L1       | 12.65 | 0.29 | NSE6 | L1       | 11.45 | 0.28 |
| NSE4                                | L2       | 13.95 | 0.45 | NSE5 | L2       | 12.05 | 0.29 | NSE6 | L2       | 10.85 | 0.28 |
| NSE4                                | L3       | 13.25 | 0.38 | NSE5 | L3       | 9.90  | 0.27 | NSE6 | L3       | 8.70  | 0.29 |
| NSE4                                | L4       | 13.25 | 0.28 | NSE5 | L4       | 11.65 | 0.26 | NSE6 | L4       | 10.45 | 0.28 |
| NSE4                                | L5       | 13.90 | 0.45 | NSE5 | L5       | 13.10 | 0.39 | NSE6 | L5       | 11.90 | 0.37 |
| NSE4                                | L6       | 14.65 | 0.31 | NSE5 | L6       | 10.40 | 0.24 | NSE6 | L6       | 9.20  | 0.18 |
| NSE4                                | L7       | 14.65 | 0.47 | NSE5 | L7       | 10.55 | 0.27 | NSE6 | L7       | 9.35  | 0.22 |
| NSE4                                | L8       | 13.65 | 0.31 | NSE5 | L8       | 14.80 | 0.35 | NSE6 | L8       | 13.60 | 0.36 |
| NSE4                                | L9       | 13.55 | 0.33 | NSE5 | L9       | 15.00 | 0.40 | NSE6 | L9       | 13.80 | 0.38 |
| NSE4                                | L10      | 16.20 | 0.44 | NSE5 | L10      | 12.60 | 0.31 | NSE6 | L10      | 11.40 | 0.34 |
| NSE4                                | L11      | 15.95 | 0.45 | NSE5 | L11      | 15.30 | 0.43 | NSE6 | L11      | 14.10 | 0.35 |
| NSE4                                | L12      | 15.20 | 0.37 | NSE5 | L12      | 13.65 | 0.35 | NSE6 | L12      | 12.45 | 0.23 |
| NSE4                                | L13      | 15.00 | 0.48 | NSE5 | L13      | 13.20 | 0.38 | NSE6 | L13      | 12.00 | 0.41 |
| NSE4                                | L14      | 14.05 | 0.38 | NSE5 | L14      | 13.75 | 0.39 | NSE6 | L14      | 12.55 | 0.40 |
| NSE4                                | L15      | 14.55 | 0.32 | NSE5 | L15      | 12.10 | 0.24 | NSE6 | L15      | 10.90 | 0.29 |
| Parents                             |          |       |      |      |          |       |      |      |          |       |      |
| NSE4                                | WH730    | 18.00 | 0.56 | NSE5 | WH730    | 16.65 | 0.54 | NSE6 | WH730    | 15.45 | 0.55 |
| NSE4                                | MACS2496 | 13.80 | 0.46 | NSE5 | MACS2496 | 15.45 | 0.50 | NSE6 | MACS2496 | 14.25 | 0.27 |
| Commercial checks                   |          |       |      |      |          |       |      |      |          |       |      |
| NSE4                                | GW322    | 17.50 | 0.49 | NSE5 | GW322    | 13.45 | 0.43 | NSE6 | GW322    | 12.25 | 0.34 |
| NSE4                                | JW3382   | 19.65 | 0.49 | NSE5 | JW3382   | 13.10 | 0.28 | NSE6 | JW3382   | 11.90 | 0.34 |
| NSE4                                | JW3288   | 13.35 | 0.39 | NSE5 | JW3288   | 16.80 | 0.60 | NSE6 | JW3288   | 15.60 | 0.37 |

ENV = Environment, GEN = Genotypes, YLD = Grain yield, GFR = Grain filling rate, NSE1 = Jabalpur-Dece-2019-20, NSE2 = Sagar-Dece-2019-20, NSE3 = Narmadapuram-Dece-2019-20, NSE4 = Jabalpur-Dece-2020-21, NSE5 = Sagar-Dece-2020-21, NSE6 = Narmadapuram-Dece-2020-21.

**Supplemental Table 2.** Mean grain yield and grain filling rate for 20 genotypes evaluated across 4 heat stress environments.

| ENV                                 | GEN      | YLD   | GFR  | ENV  | GEN      | YLD   | GFR  |
|-------------------------------------|----------|-------|------|------|----------|-------|------|
| HSE1                                | L1       | 9.80  | 0.31 | HSE2 | L1       | 10.30 | 0.36 |
| HSE1                                | L2       | 9.75  | 0.31 | HSE2 | L2       | 10.15 | 0.35 |
| HSE1                                | L3       | 9.35  | 0.49 | HSE2 | L3       | 9.10  | 0.41 |
| HSE1                                | L4       | 8.70  | 0.39 | HSE2 | L4       | 14.35 | 0.46 |
| HSE1                                | L5       | 8.35  | 0.39 | HSE2 | L5       | 15.15 | 0.54 |
| HSE1                                | L6       | 10.50 | 0.36 | HSE2 | L6       | 13.25 | 0.48 |
| HSE1                                | L7       | 10.75 | 0.51 | HSE2 | L7       | 10.10 | 0.43 |
| HSE1                                | L8       | 12.65 | 0.36 | HSE2 | L8       | 12.30 | 0.38 |
| HSE1                                | L9       | 9.55  | 0.39 | HSE2 | L9       | 9.15  | 0.32 |
| HSE1                                | L10      | 13.35 | 0.65 | HSE2 | L10      | 12.05 | 0.44 |
| HSE1                                | L11      | 11.45 | 0.42 | HSE2 | L11      | 10.15 | 0.36 |
| HSE1                                | L12      | 9.50  | 0.40 | HSE2 | L12      | 11.00 | 0.45 |
| HSE1                                | L13      | 10.35 | 0.43 | HSE2 | L13      | 13.10 | 0.53 |
| HSE1                                | L14      | 10.40 | 0.42 | HSE2 | L14      | 9.90  | 0.41 |
| HSE1                                | L15      | 11.75 | 0.35 | HSE2 | L15      | 11.15 | 0.42 |
| Parents                             |          |       |      |      |          |       |      |
| HSE1                                | WH730    | 12.40 | 0.42 | HSE2 | WH730    | 11.80 | 0.41 |
| HSE1                                | MACS2496 | 9.40  | 0.41 | HSE2 | MACS2496 | 10.10 | 0.37 |
| Commercial checks                   |          |       |      |      |          |       |      |
| HSE1                                | GW322    | 12.65 | 0.43 | HSE2 | GW322    | 10.45 | 0.42 |
| HSE1                                | JW3382   | 11.70 | 0.46 | HSE2 | JW3382   | 10.00 | 0.35 |
| HSE1                                | JW3288   | 10.55 | 0.41 | HSE2 | JW3288   | 8.20  | 0.30 |
| Supplemental Table 2. Continued ... |          |       |      |      |          |       |      |
| ENV                                 | GEN      | YLD   | GFR  | ENV  | GEN      | YLD   | GFR  |
| HSE3                                | L1       | 13.40 | 0.42 | HSE4 | L1       | 11.65 | 0.38 |
| HSE3                                | L2       | 9.85  | 0.32 | HSE4 | L2       | 12.05 | 0.43 |
| HSE3                                | L3       | 10.55 | 0.49 | HSE4 | L3       | 10.05 | 0.30 |
| HSE3                                | L4       | 12.05 | 0.50 | HSE4 | L4       | 11.55 | 0.35 |
| HSE3                                | L5       | 10.95 | 0.50 | HSE4 | L5       | 13.05 | 0.44 |
| HSE3                                | L6       | 10.85 | 0.38 | HSE4 | L6       | 9.45  | 0.31 |
| HSE3                                | L7       | 12.15 | 0.51 | HSE4 | L7       | 8.90  | 0.37 |
| HSE3                                | L8       | 12.60 | 0.35 | HSE4 | L8       | 10.40 | 0.30 |
| HSE3                                | L9       | 11.30 | 0.41 | HSE4 | L9       | 8.80  | 0.28 |
| HSE3                                | L10      | 9.65  | 0.45 | HSE4 | L10      | 9.70  | 0.37 |
| HSE3                                | L11      | 12.40 | 0.44 | HSE4 | L11      | 15.15 | 0.51 |
| HSE3                                | L12      | 11.10 | 0.44 | HSE4 | L12      | 14.40 | 0.56 |
| HSE3                                | L13      | 12.20 | 0.45 | HSE4 | L13      | 10.50 | 0.41 |
| HSE3                                | L14      | 13.35 | 0.61 | HSE4 | L14      | 11.15 | 0.43 |
| HSE3                                | L15      | 11.55 | 0.34 | HSE4 | L15      | 11.15 | 0.43 |
| Parents                             |          |       |      |      |          |       |      |
| HSE3                                | WH730    | 14.10 | 0.53 | HSE4 | WH730    | 9.05  | 0.30 |
| HSE3                                | MACS2496 | 12.20 | 0.53 | HSE4 | MACS2496 | 7.15  | 0.25 |
| Commercial checks                   |          |       |      |      |          |       |      |
| HSE3                                | GW322    | 10.90 | 0.35 | HSE4 | GW322    | 10.90 | 0.45 |
| HSE3                                | JW3382   | 13.00 | 0.47 | HSE4 | JW3382   | 11.05 | 0.38 |
| HSE3                                | JW3288   | 13.55 | 0.48 | HSE4 | JW3288   | 9.80  | 0.35 |

ENV = Environment, GEN = Genotypes, YLD = Grain yield, GFR = Grain filling rate, HSE1 = Jabalpur-Jan-2019-20, HSE2 = Narmadapuram-Jan-2019-20, HSE3 = Jabalpur-Jan-2020-21, HSE4 = Narmadapuram-Jan-2020-21.

**Supplemental Table 3.** Across all the environment stability parameters for grain yield and grain filling rate

| Genotypes         | YLD   |          |       |          |      |           |     | GFR   |          |       |          |      |           |     |
|-------------------|-------|----------|-------|----------|------|-----------|-----|-------|----------|-------|----------|------|-----------|-----|
|                   | $G_m$ | $R_{gm}$ | $b_i$ | $S^2d_i$ | ASV  | $R_{ASV}$ | GSI | $G_m$ | $R_{gm}$ | $b_i$ | $S^2d_i$ | ASV  | $R_{ASV}$ | GSI |
| L1                | 11.80 | 9        | 0.98  | 2.38     | 1.30 | 9         | 18  | 0.32  | 17       | 0.53  | 0.00     | 0.02 | 1         | 18  |
| L2                | 10.84 | 16       | 0.44  | 2.31     | 0.87 | 5         | 21  | 0.32  | 19       | 0.35  | 0.00     | 0.29 | 12        | 31  |
| L3                | 10.56 | 18       | 0.42  | 4.83     | 1.75 | 15        | 33  | 0.35  | 13       | 1.41  | 0.01     | 0.26 | 10        | 23  |
| L4                | 12.29 | 8        | 0.71  | 1.04     | 0.46 | 2         | 10  | 0.34  | 14       | 1.45  | 0.00     | 0.19 | 8         | 22  |
| L5                | 13.15 | 2        | 2.00  | 7.16     | 3.21 | 20        | 22  | 0.43  | 2        | 1.58  | 0.01     | 0.38 | 16        | 18  |
| L6                | 12.58 | 5        | 1.19  | 4.49     | 1.97 | 16        | 21  | 0.33  | 16       | 0.97  | 0.00     | 0.14 | 6         | 22  |
| L7                | 11.62 | 10       | 1.83  | 4.98     | 2.64 | 19        | 29  | 0.37  | 12       | 1.87  | 0.00     | 0.28 | 11        | 23  |
| L8                | 12.97 | 3        | 0.58  | 9.70     | 2.09 | 18        | 21  | 0.33  | 15       | 0.35  | 0.00     | 0.22 | 9         | 24  |
| L9                | 11.39 | 11       | 1.07  | 7.42     | 2.02 | 17        | 28  | 0.32  | 18       | 0.49  | 0.01     | 0.36 | 15        | 33  |
| L10               | 11.36 | 12       | 1.22  | 2.51     | 1.48 | 12        | 24  | 0.39  | 10       | 1.41  | 0.01     | 0.45 | 18        | 28  |
| L11               | 12.51 | 7        | 1.67  | 5.21     | 1.36 | 10        | 17  | 0.41  | 7        | 0.83  | 0.00     | 0.03 | 2         | 9   |
| L12               | 12.54 | 6        | 1.85  | 0.90     | 0.76 | 4         | 10  | 0.38  | 11       | 1.41  | 0.00     | 0.18 | 7         | 18  |
| L13               | 13.55 | 1        | 1.61  | 3.47     | 1.27 | 8         | 9   | 0.41  | 4        | 1.35  | 0.00     | 0.13 | 5         | 9   |
| L14               | 12.78 | 4        | 1.38  | 4.47     | 1.71 | 14        | 18  | 0.41  | 6        | 1.23  | 0.01     | 0.29 | 13        | 19  |
| L15               | 11.02 | 15       | 1.16  | 4.38     | 1.65 | 13        | 28  | 0.32  | 20       | 0.99  | 0.00     | 0.30 | 14        | 34  |
| Parents           |       |          |       |          |      |           |     |       |          |       |          |      |           |     |
| WH730             | 11.10 | 14       | 0.78  | 0.05     | 0.20 | 1         | 15  | 0.54  | 1        | 0.9   | 0.04     | 1.34 | 20        | 21  |
| MACS2496          | 08.92 | 20       | 0.40  | 2.17     | 1.22 | 7         | 27  | 0.42  | 3        | 1.11  | 0.01     | 0.51 | 19        | 22  |
| Commercial checks |       |          |       |          |      |           |     |       |          |       |          |      |           |     |
| GW322             | 11.14 | 13       | 0.58  | 3.46     | 1.44 | 11        | 24  | 0.40  | 8        | 0.84  | 0.00     | 0.08 | 4         | 12  |
| JW3382            | 10.57 | 17       | 0.44  | 0.52     | 0.60 | 3         | 20  | 0.39  | 9        | 0.93  | 0.00     | 0.04 | 3         | 12  |
| JW3288            | 10.22 | 19       | 0.20  | 0.89     | 1.21 | 6         | 25  | 0.41  | 5        | 0     | 0.01     | 0.39 | 17        | 22  |

*YLD* = Grain yield, *GFR* = Grain filling rate,  $G_m$  = grand mean,  $R_{gm}$  = Rank by grand mean,  $b_i$  = Regression coefficient of Eberhart and Russell,  $S^2d_i$  = Deviation form regression of Eberhart and Russel model, *ASV* = AMMI stability value,  $R_{ASV}$  = Rank by AMMI stability value, *GSI* = Genomic selection index.

**Supplemental Table 4.** Across all the environments AMMI-based ANOVA for grain yield and grain filling rate

| Source       | YLD |       |                   |                 | GFR    |                   |                 |
|--------------|-----|-------|-------------------|-----------------|--------|-------------------|-----------------|
|              | DF  | MSS   | Percent Explained | <i>p</i> -value | MSS    | Percent Explained | <i>p</i> -value |
| Environment  | 9   | 54.20 | 12.3              | <0.001          | 0.118  | 14.5              | <0.001          |
| Block        | 10  | 0.50  | 0.001             | 0.65            | 0.001  | 0.002             | 0.143           |
| Genotype     | 19  | 26.60 | 12.8              | <0.001          | 0.059  | 15.4              | <0.001          |
| <i>G x E</i> | 171 | 8.29  | 35.8              | <0.001          | 0.014  | 33.7              | <0.001          |
| PC1          | 27  | 18.30 | 46.2              | <0.001          | 0.036  | 39.6              | <0.001          |
| PC2          | 25  | 12.40 | 22.7              | <0.001          | 0.019  | 19.9              | <0.001          |
| PC3          | 23  | 8.68  | 14.1              | <0.001          | 0.012  | 11.4              | <0.001          |
| PC4          | 21  | 7.70  | 11.4              | <0.001          | 0.010  | 8.1               | <0.001          |
| PC5          | 19  | 6.14  | 8.20              | <0.001          | 0.009  | 6.9               | <0.001          |
| PC6          | 17  | 4.33  | 5.20              | <0.001          | 0.008  | 5.5               | <0.001          |
| PC7          | 15  | 2.78  | 2.90              | <0.001          | 0.006  | 3.9               | <0.001          |
| PC8          | 13  | 1.52  | 1.40              | <0.001          | 0.006  | 2.9               | <0.001          |
| PC9          | 11  | 0.14  | 0.10              | <0.001          | 0.004  | 1.9               | <0.001          |
| Residuals    | 190 | 0.65  | 2.10              | -               | 0.0009 | 0.02              | -               |
| Total        | 570 | 6.94  | -                 | -               | 7.32   | -                 | -               |

*YLD* = Grain yield, *GFR* = Grain filling rate, *DF* = degree of freedom, *MSS* = mean sum of square, *G x E* = Genotype by environment interactions, *PC* = Principal component, \**p* < 0.05, \*\**p* < 0.01 and \*\*\**p* < 0.001.

**Supplemental Table 5.** Meteorological data for Jabalpur district in Madhya Pradesh, India, was collected on a weekly basis during the crop growth period.

| Period        | Temperature ( $^{\circ}\text{C}$ ) |         |         |         | Relative Humidity |         |         |         | Rainfall       |                | Rainy days |           | Sun Shine hours    |                    |
|---------------|------------------------------------|---------|---------|---------|-------------------|---------|---------|---------|----------------|----------------|------------|-----------|--------------------|--------------------|
|               | Maximum                            |         | Minimum |         | Morning           | Morning | Evening | Evening | (milli meters) | (milli meters) | (in days)  | (in days) | (hrs day $^{-1}$ ) | (hrs day $^{-1}$ ) |
|               | 2019-20                            | 2020-21 | 2019-20 | 2020-21 | 2019-20           | 2020-21 | 2019-20 | 2020-21 | 2019-20        | 2020-21        | 2019-20    | 2020-21   | 2019-20            | 2020-21            |
| 3Dec.-9Dec.   | 25.8                               | 29.3    | 8.4     | 9.1     | 90                | 81      | 46      | 29      | 0              | 0              | 0          | 0         | 6.8                | 9.4                |
| 10-16Dec.     | 24.8                               | 26.4    | 12.1    | 14.7    | 95                | 88      | 70      | 57      | 12.4           | 2.3            | 2          | 0         | 3.6                | 3.2                |
| 17-23Dec.     | 21                                 | 23.2    | 6.3     | 5.5     | 89                | 74      | 55      | 31      | 0              | 0              | 0          | 0         | 5.3                | 7.4                |
| 24-31Dec.     | 22.1                               | 23.8    | 6.7     | 7.2     | 87                | 83      | 50      | 43      | 0              | 0              | 0          | 0         | 5.9                | 6.2                |
| 1-7Jan.       | 20.3                               | 26.5    | 10.3    | 12.4    | 91                | 87      | 62      | 50      | 17.9           | 0.5            | 2          | 0         | 3.5                | 4.5                |
| 8-14Jan.      | 22                                 | 25      | 8       | 11.8    | 89                | 86      | 48      | 49      | 15.8           | 0.4            | 1          | 0         | 7.7                | 5.7                |
| 15-21Jan.     | 23.8                               | 25.4    | 11.2    | 8       | 89                | 75      | 51      | 31      | 0.4            | 0              | 0          | 0         | 5.9                | 8.2                |
| 22-28Jan.     | 24.1                               | 24.6    | 9.1     | 8.6     | 84                | 86      | 44      | 49      | 0              | 0              | 0          | 0         | 7.8                | 7.4                |
| 29Jan.-4Feb.  | 24.2                               | 21.4    | 8.3     | 4.8     | 88                | 73      | 41      | 31      | 0              | 0              | 0          | 0         | 7.3                | 6                  |
| 5-11Feb.      | 22.2                               | 26.4    | 7.9     | 8.9     | 85                | 72      | 40      | 34      | 8.7            | 0              | 1          | 0         | 6.6                | 9.1                |
| 12-18Feb.     | 26.8                               | 27.7    | 7.5     | 11.8    | 90                | 83      | 32      | 42      | 0              | 12.6           | 0          | 1         | 9.8                | 7.7                |
| 19-25Feb.     | 28.8                               | 28.6    | 14.1    | 10.6    | 86                | 79      | 49      | 28      | 0              | 0              | 0          | 0         | 6.4                | 9.3                |
| 26Feb. -4Mar. | 29.2                               | 32.7    | 12.7    | 12.4    | 87                | 74      | 34      | 25      | 1.8            | 0              | 0          | 0         | 8.3                | 9.8                |
| 5-11Mar.      | 28.5                               | 34.8    | 13.1    | 13      | 84                | 74      | 45      | 20      | 0.8            | 0              | 0          | 0         | 7.4                | 8.9                |
| 12-18Mar.     | 29.9                               | 32.3    | 14.7    | 15.3    | 81                | 78      | 35      | 29      | 0.5            | 6.2            | 0          | 1         | 7.6                | 7                  |
| 19-25Mar.     | 31.6                               | 33.9    | 16.9    | 16.7    | 69                | 67      | 40      | 27      | 36.4           | 0              | 1          | 0         | 7.2                | 5                  |
| 26Mar.-1Apr.  | 34.5                               | 36.8    | 20.4    | 16.7    | 61                | 57      | 33      | 13      | 0.9            | 0              | 0          | 0         | 7.5                | 8.5                |
| 2-8Apr.       | 36.8                               | 38.3    | 20.3    | 14.8    | 45                | 64      | 22      | 11      | 0              | 0              | 0          | 0         | 7.1                | 8.6                |
| 9-15Apr.      | 38.9                               | 37.7    | 21.6    | 18.6    | 37                | 61      | 21      | 22      | 0              | 0.6            | 0          | 0         | 9.4                | 8                  |
| 16-22Apr.     | 38.7                               | 37      | 24.5    | 18      | 45                | 53      | 23      | 19      | 0              | 0              | 0          | 0         | 7.7                | 7.2                |
| 23-29Apr.     | 37.9                               | 38.2    | 23      | 17.5    | 51                | 52      | 28      | 13      | 0              | 0              | 0          | 0         | 7.8                | 9.9                |
| 30Apr.-6May   | 39.3                               | 38.8    | 24      | 23.2    | 50                | 47      | 26      | 24      | 0              | 2.6            | 0          | 1         | 10                 | 7.8                |

*Dec.* = December, *Jan.* = January, *Feb.* = February, *Mar.* = March, *Apr.* = April, *May* = May, *hrs day $^{-1}$*  = Hours per day.

**Supplemental Table 6.** Meteorological data for Narmadapuram district in Madhya Pradesh, India, was collected on a weekly basis during the crop growth period.

| Period          | Temperature (° C) |         |         |         | Relative humidity (%) |         |         |         | Rainfall       |                | Rainy days |           | Sun Shine                |                          |
|-----------------|-------------------|---------|---------|---------|-----------------------|---------|---------|---------|----------------|----------------|------------|-----------|--------------------------|--------------------------|
|                 | Maximum           |         | Minimum |         | Morning               |         | Evening |         | (milli meters) | (milli meters) | (in days)  | (in days) | (hrs day <sup>-1</sup> ) | (hrs day <sup>-1</sup> ) |
|                 | 2019-20           | 2020-21 | 2019-20 | 2020-21 | 2019-20               | 2020-21 | 2019-20 | 2020-21 | 2019-20        | 2020-21        | 2019-20    | 2020-21   | 2019-20                  | 2020-21                  |
| 3 Dec.-9 Dec.   | 30                | 30.5    | 10      | 11      | 80                    | 76      | 33      | 45      | 0              | 0              | 0          | 0         | 4.4                      | 8.5                      |
| 10 Dec.-16 Dec. | 29.5              | 31.5    | 11.5    | 10.5    | 94                    | 71      | 59      | 40      | 8              | 0              | 1          | 0         | 7.2                      | 6.7                      |
| 17 Dec.-23 Dec. | 27                | 28.5    | 10      | 16.5    | 93                    | 96      | 42      | 53      | 0              | 7.2            | 0          | 4         | 7.1                      | 6.6                      |
| 24 Dec.-31 Dec. | 26.5              | 25.5    | 5.5     | 8.5     | 82                    | 80      | 42      | 39      | 1.8            | 0              | 1          | 0         | 8.2                      | 4.3                      |
| 1 Jan.-7 Jan.   | 25                | 26      | 7       | 9       | 77                    | 65      | 52      | 40      | 2              | 0              | 1          | 0         | 6.9                      | 7.3                      |
| 8 Jan.-14 Jan.  | 27                | 26      | 4       | 13.5    | 94                    | 90      | 47      | 57      | 0              | 1.5            | 0          | 1         | 4.8                      | 7.7                      |
| 15 Jan.-21 Jan. | 27                | 27      | 5       | 7       | 93                    | 92      | 59      | 41      | 0              | 0              | 0          | 0         | 7.8                      | 8.9                      |
| 22 Jan.-28 Jan. | 27                | 28.5    | 7.5     | 6       | 96                    | 80      | 48      | 39      | 0              | 0              | 0          | 0         | 3.3                      | 9.6                      |
| 29 Jan.-4 Feb.  | 24.5              | 27.5    | 6.5     | 7       | 82                    | 93      | 47      | 45      | 0              | 0              | 0          | 0         | 8                        | 9.3                      |
| 5 Feb.- 11 Feb. | 24.5              | 29      | 6.5     | 5.5     | 96                    | 74      | 38      | 31      | 0              | 0              | 0          | 0         | 6.4                      | 8.1                      |
| 12 Feb.-18 Feb. | 30                | 28      | 7       | 5.5     | 87                    | 84      | 35      | 42      | 0              | 0              | 0          | 0         | 7.2                      | 9                        |
| 19 Feb.-25 Feb. | 31                | 28      | 8.5     | 6       | 80                    | 88      | 30      | 40      | 0              | 1              | 0          | 1         | 7.5                      | 9.1                      |
| 26 Feb.-4 Mar.  | 30                | 32      | 9       | 11      | 73                    | 74      | 34      | 28      | 1.2            | 0              | 1          | 0         | 7.3                      | 9.2                      |
| 4 Mar.- 11 Mar. | 30                | 35      | 10      | 11      | 80                    | 66      | 27      | 14      | 0              | 0              | 0          | 0         | 7.9                      | 7.7                      |
| 12 Mar.-18 Mar. | 33                | 35.5    | 9       | 11.5    | 68                    | 75      | 23      | 14      | 0              | 0              | 0          | 0         | 6                        | 6.7                      |
| 19 Mar.-25 Mar. | 39.2              | 37      | 12      | 14      | 74                    | 78      | 30      | 33      | 3.1            | 1.8            | 1          | 1         | 8.1                      | 7.7                      |
| 26 Mar.-1 Apr.  | 39.5              | 36      | 17      | 14      | 93                    | 66      | 20      | 25      | 8.5            | 0              | 2          | 0         | 8                        | 8.4                      |
| 2 Apr.-8 Apr.   | 41.2              | 40.2    | 15      | 14.5    | 54                    | 62      | 15      | 9       | 0              | 0              | 0          | 0         | 7.5                      | 8.7                      |
| 9 Apr.-15 Apr.  | 44.3              | 40.5    | 17.5    | 15      | 46                    | 51      | 18      | 9       | 0              | 0              | 0          | 0         | 8.1                      | 7.3                      |
| 16 Apr.-22 Apr. | 42.8              | 41      | 18      | 22      | 57                    | 50      | 16      | 12      | 2.8            | 0              | 1          | 0         | 9.2                      | 8                        |
| 23 Apr.-29 Apr. | 40.3              | 40.5    | 20.5    | 21      | 52                    | 49      | 16      | 14      | 0              | 0              | 0          | 0         | 9.4                      | 9.5                      |
| 30 Apr.-6 May   | 43                | 40.5    | 22      | 22.5    | 48                    | 54      | 17      | 11      | 0              | 0              | 0          | 0         | 9.2                      | 9.1                      |

*Dec.* = December, *Jan.* = January, *Feb.* = February, *Mar.* = March, *Apr.* = April, *May* = May, *hrs day<sup>-1</sup>* = Hours per day.



**Supplemental Table 7.** Meteorological data for Sagar district in Madhya Pradesh, India, was collected on a weekly basis during the crop growth period.

| Period          | Temperature (° C) |         |         |         | Relative humidity (%) |         |         |         | Rainfall       |                | Rainy days |           | Sun Shine                |                          |
|-----------------|-------------------|---------|---------|---------|-----------------------|---------|---------|---------|----------------|----------------|------------|-----------|--------------------------|--------------------------|
|                 | Maximum           |         | Minimum |         | Morning               |         | Evening |         | (milli meters) | (milli meters) | (in days)  | (in days) | (hrs day <sup>-1</sup> ) | (hrs day <sup>-1</sup> ) |
|                 | 2019-20           | 2020-21 | 2019-20 | 2020-21 | 2019-20               | 2020-21 | 2019-20 | 2020-21 | 2019-20        | 2020-21        | 2019-20    | 2020-21   | 2019-20                  | 2020-21                  |
| 3 Dec.-9 Dec.   | 25.1              | 26.9    | 12.4    | 11.2    | 68.1                  | 82      | 54.1    | 68      | 0              | 0              | 0          | 0         | 7.8                      | 8.1                      |
| 10 Dec.-16 Dec. | 23.9              | 25.7    | 13.2    | 15.7    | 85.6                  | 87      | 68      | 66      | 0.7            | 0.3            | 1          | 1         | 4.6                      | 4.2                      |
| 17 Dec.-23 Dec. | 22                | 22.6    | 9.2     | 8.1     | 83.6                  | 85      | 61      | 70      | 0              | 0              | 0          | 0         | 5.3                      | 7.7                      |
| 24 Dec.-31 Dec. | 20.1              | 22.8    | 6.9     | 6.9     | 78.4                  | 81      | 60.1    | 67      | 0              | 0              | 0          | 0         | 5.7                      | 6.5                      |
| 1 Jan.-7 Jan.   | 21.5              | 27.2    | 9.4     | 10.8    | 95.6                  | 87      | 76.9    | 79      | 0              | 0              | 0          | 0         | 3.7                      | 4.5                      |
| 8 Jan.-14 Jan.  | 22.4              | 24.4    | 9.3     | 9.1     | 73.6                  | 80      | 55.1    | 77      | 0.6            | 0.8            | 1          | 1         | 4.7                      | 4.3                      |
| 15 Jan.-21 Jan. | 22.6              | 26.3    | 12.1    | 6.7     | 87.9                  | 82      | 69.7    | 70      | 0.2            | 0              | 1          | 0         | 6.2                      | 7.2                      |
| 22 Jan.-28 Jan. | 23.3              | 26.8    | 9.4     | 8.8     | 75                    | 83      | 53.7    | 75      | 1              | 0              | 1          | 0         | 4.8                      | 7.4                      |
| 29 Jan.-4 Feb.  | 23.5              | 28.4    | 11.5    | 7.4     | 64.6                  | 79      | 44.3    | 65      | 0              | 0              | 0          | 0         | 7.1                      | 6                        |
| 5 Feb.- 11 Feb. | 23.1              | 27.0    | 10.4    | 8.9     | 63.6                  | 77      | 46.7    | 69      | 0.6            | 0              | 1          | 0         | 4.6                      | 8.8                      |
| 12 Feb.-18 Feb. | 28.1              | 27.9    | 11.6    | 12.1    | 53.6                  | 82      | 35.9    | 73      | 0              | 0              | 0          | 0         | 8.8                      | 7.7                      |
| 19 Feb.-25 Feb. | 30                | 30.4    | 15.9    | 13.4    | 54.4                  | 74      | 33.3    | 64      | 0              | 0              | 0          | 0         | 6.4                      | 9.5                      |
| 26 Feb.-4 Mar.  | 29.2              | 31.4    | 15.3    | 14.1    | 68.7                  | 64      | 39.1    | 53      | 0              | 0              | 0          | 0         | 8.1                      | 9.8                      |
| 4 Mar.- 11 Mar. | 29.6              | 33.1    | 15.9    | 16.1    | 61.3                  | 55      | 33.6    | 45      | 0.6            | 0              | 1          | 0         | 7.4                      | 8.9                      |
| 12 Mar.-18 Mar. | 29.3              | 34.2    | 15.6    | 17.1    | 62                    | 70      | 36      | 56      | 3.2            | 0              | 2          | 0         | 6.6                      | 7                        |
| 19 Mar.-25 Mar. | 33                | 32.9    | 18.7    | 18.8    | 53.7                  | 61      | 32.4    | 47      | 0              | 0              | 0          | 0         | 6.9                      | 5                        |
| 26 Mar.-1 Apr.  | 32.5              | 37.3    | 19.7    | 16.9    | 56.1                  | 43      | 42.3    | 32      | 3.8            | 0              | 2          | 0         | 7.5                      | 8.5                      |
| 2 Apr.-8 Apr.   | 36.8              | 37.9    | 20.7    | 17.2    | 39.1                  | 42      | 26.4    | 31      | 0              | 0              | 0          | 0         | 7.1                      | 8.6                      |
| 9 Apr.-15 Apr.  | 38.2              | 38.9    | 23.6    | 22.2    | 33.4                  | 45      | 20      | 36      | 0              | 0              | 0          | 0         | 9.6                      | 8                        |
| 16 Apr.-22 Apr. | 39.6              | 40.1    | 25.4    | 21.1    | 34.9                  | 46      | 25.9    | 35      | 0              | 0              | 0          | 0         | 7.7                      | 7.2                      |
| 23 Apr.-29 Apr. | 42.3              | 42.2    | 24.3    | 23.3    | 35.3                  | 35      | 26.8    | 31      | 0              | 0              | 0          | 0         | 7.8                      | 9.3                      |
| 30 Apr.-6 May   | 42.1              | 40.3    | 25.6    | 24.1    | 33.1                  | 42      | 24.3    | 35      | 0              | 0              | 0          | 0         | 9.4                      | 7.8                      |

*Dec.* = December, *Jan.* = January, *Feb.* = February, *Mar.* = March, *Apr.* = April, *May* = May, *hrs day<sup>-1</sup>* = Hours per day.
